# Supplementary material
Source: PubMed Central journal article supplement (PMC7458068)
Supplement: mmc1.pdf [file mmc1.pdf]

# Amplification plot of case 31 showing quantitative screening assay of RNaseP and E gene

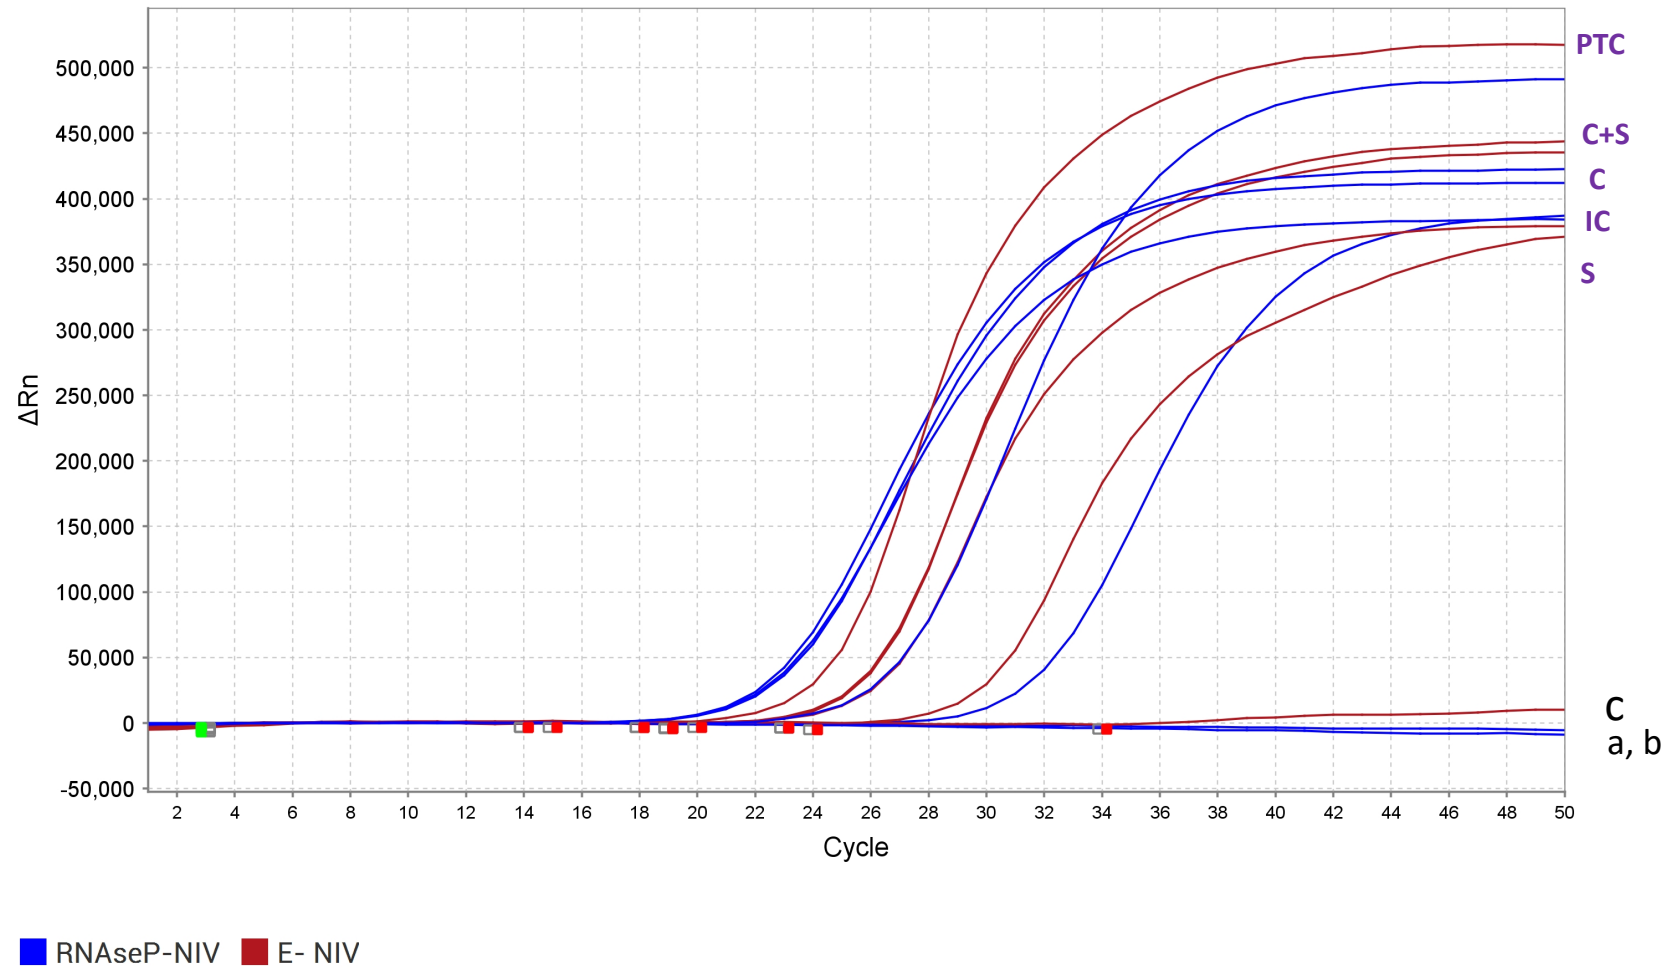

Negative test controls RNaseP (a,b); Negative test controls E gene (c); Kit positive control E gene (PTC, Ct-20); Mock control E gene (IC, Ct-24); Group 1:Conjunctival + Schirmer (C+S, Ct-22); Group 2:Conjunctival (C, Ct-23); Group 3: Schirmer strip (S, Ct28)

# Amplification plot of case 31 showing qualitative assay of E gene

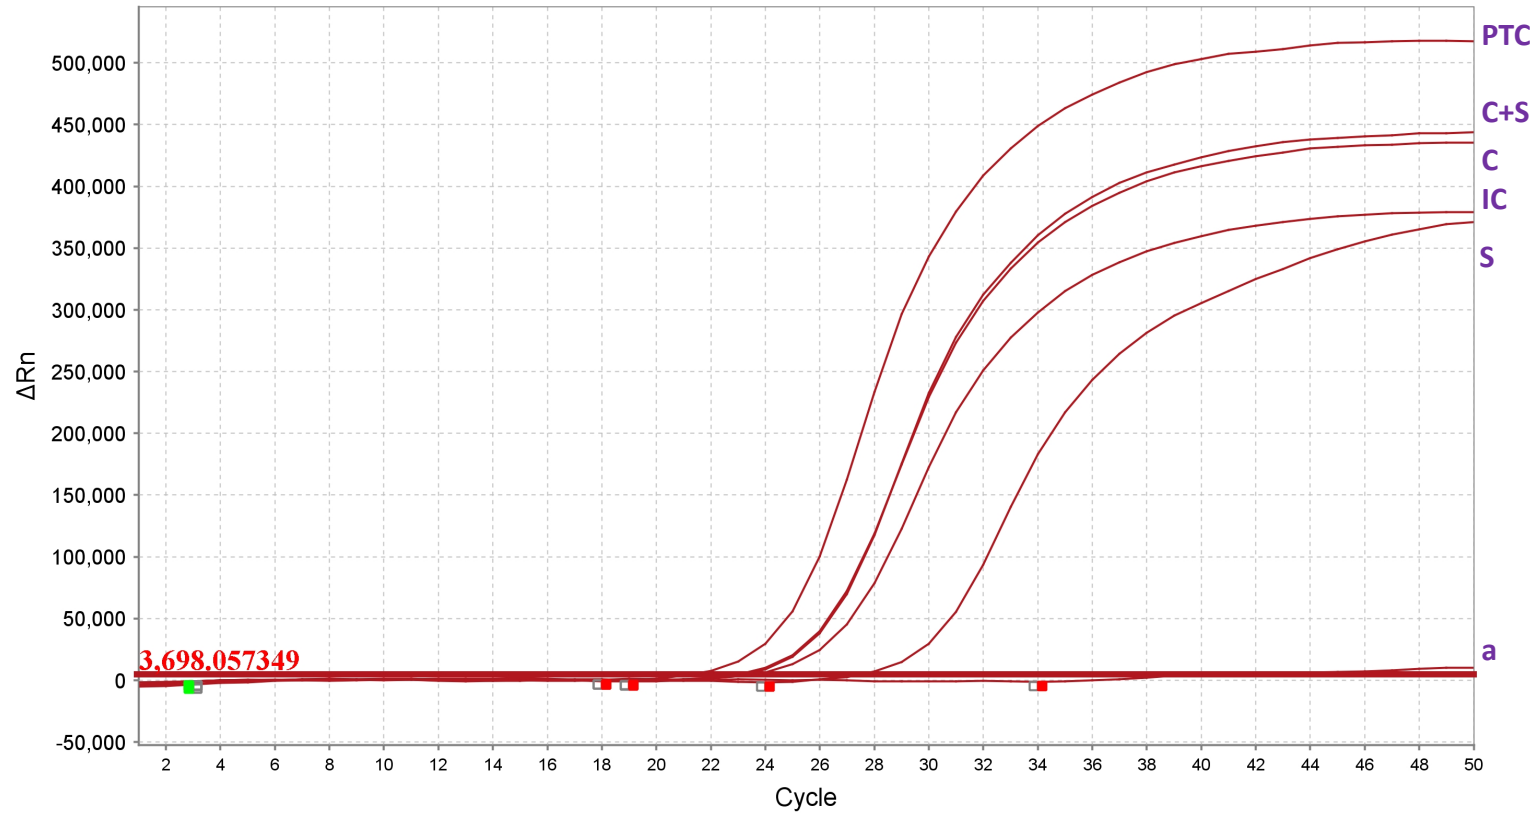

■ E- NIV

Negative test control E gene (a); Kit positive control E gene (PTC, Ct-20); Mock control E gene (IC, Ct-24), Group 1:Conjunctival + Schirmer + Schirmer (C+S, Ct-22); Group2: Conjunctival (C, Ct-23); Group 3:Schirmer strip (S, Ct-28).

## Amplification plot of case 31 showing confirmatory qualitative assay of RdRp gene

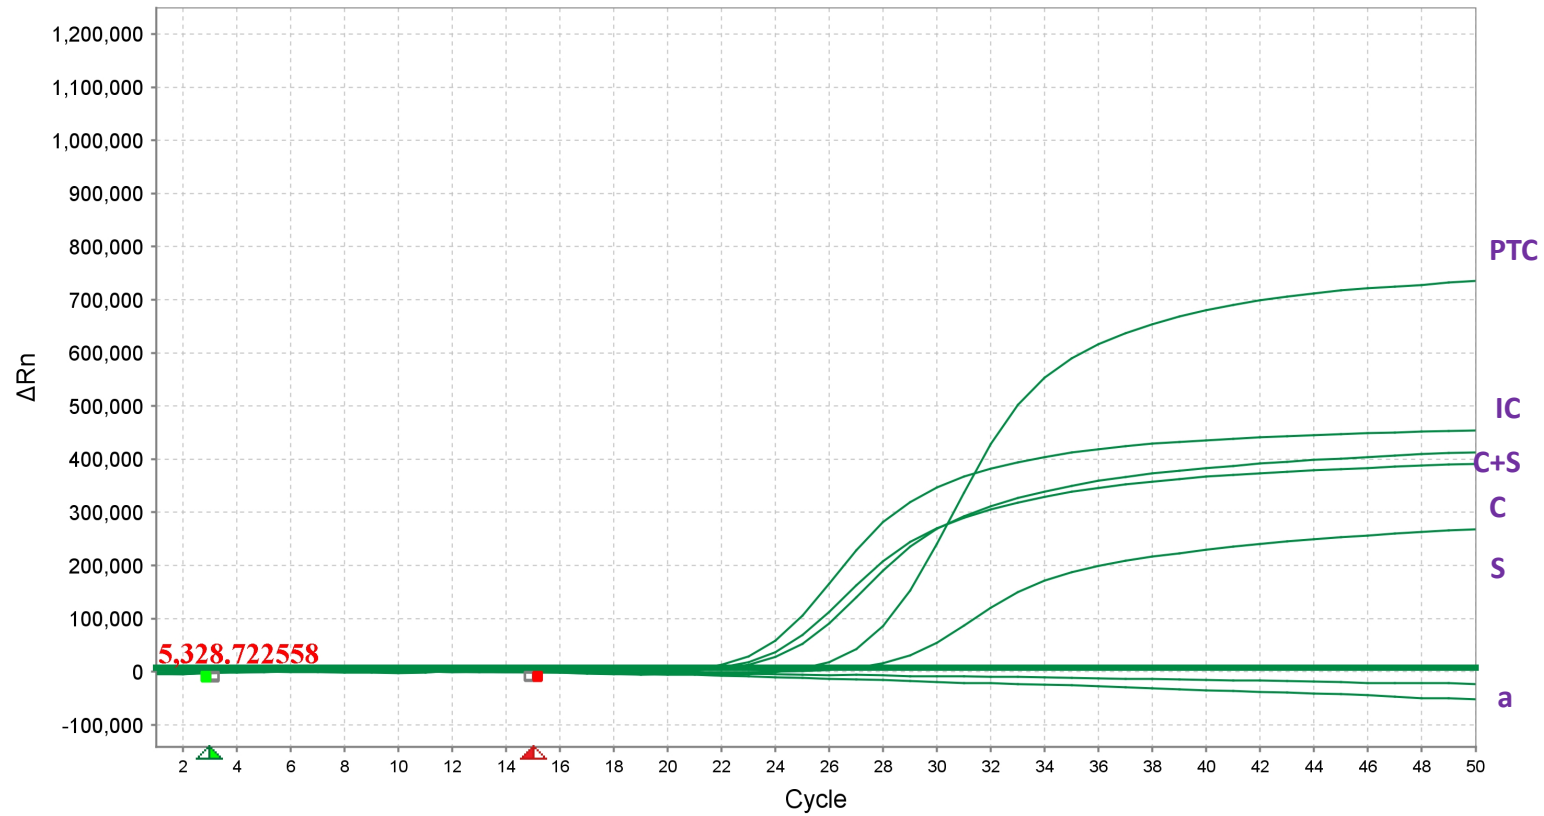

■ RdRp-NIV

Negative test controls RdRp gene (a); Kit positive control RdRp gene (PTC, Ct-25); Mock control E gene (IC; Ct-21), Group 1:Conjunctival + Schirmer (C+S, Ct-22); Group2:Conjunctival (C, Ct-23); Group3:Schirmer strip (S, Ct27)

# Amplification plot of case 31 showing confirmatory qualitative assay of ORF1b gene

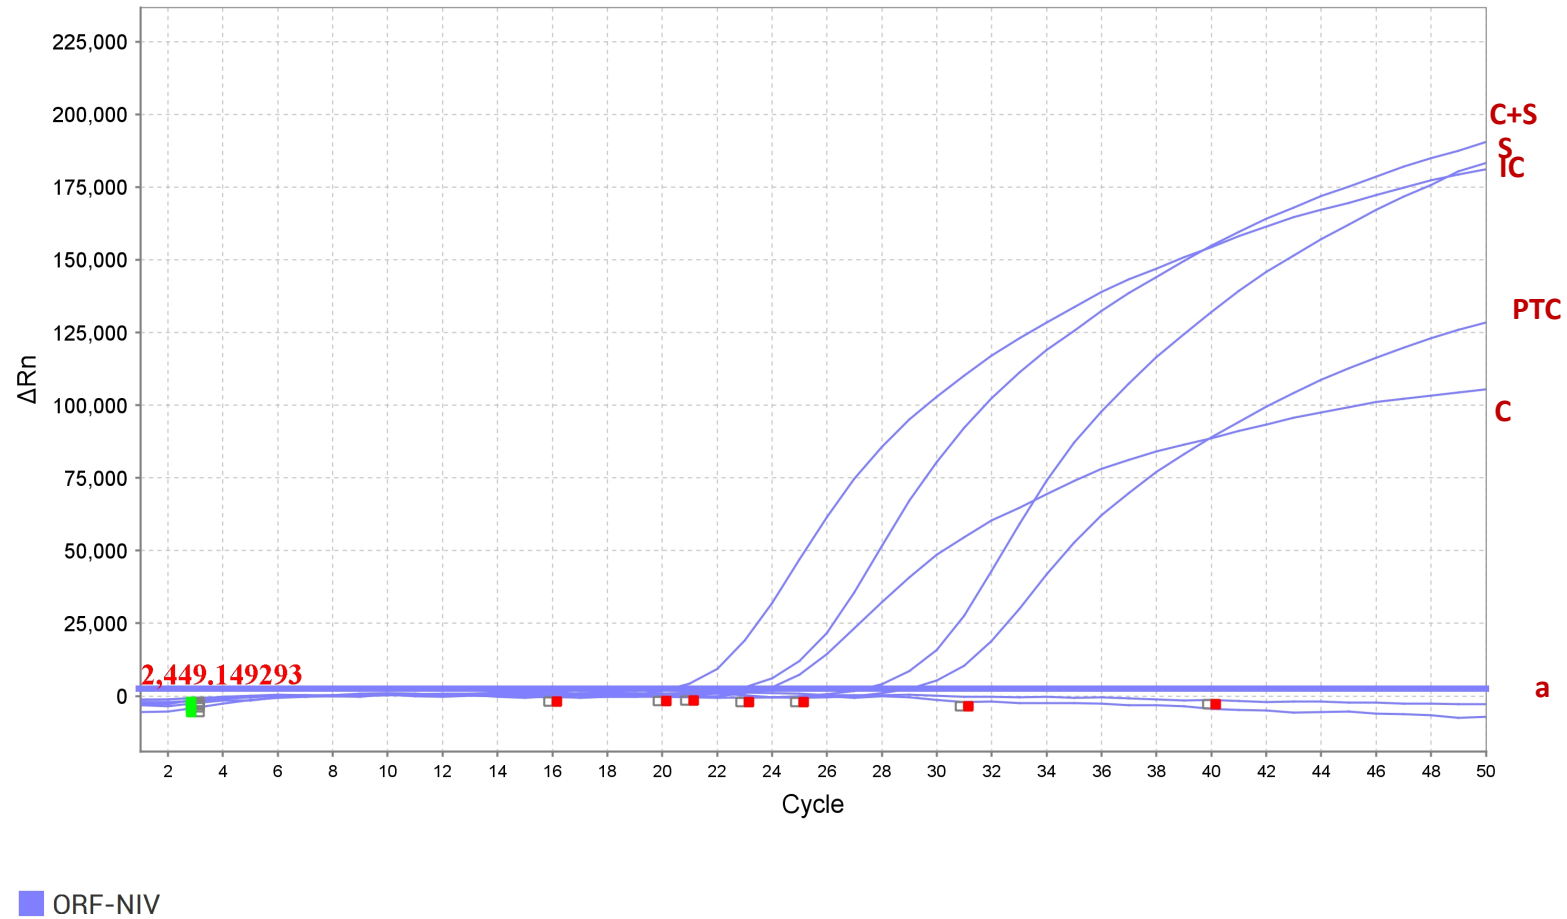

Negative test controls ORF1b gene (a); Kit positive control ORF1b gene (PTC, Ct-29); Mock control E gene (IC; Ct-21); Group1:Conjunctival + Schirmer (C+S, Ct-22); Group2:Conjunctival (C, Ct-23); Group3:Schirmer strip (S, Ct27)

# Amplification plot of case 40 showing screening qualitative assay of E gene

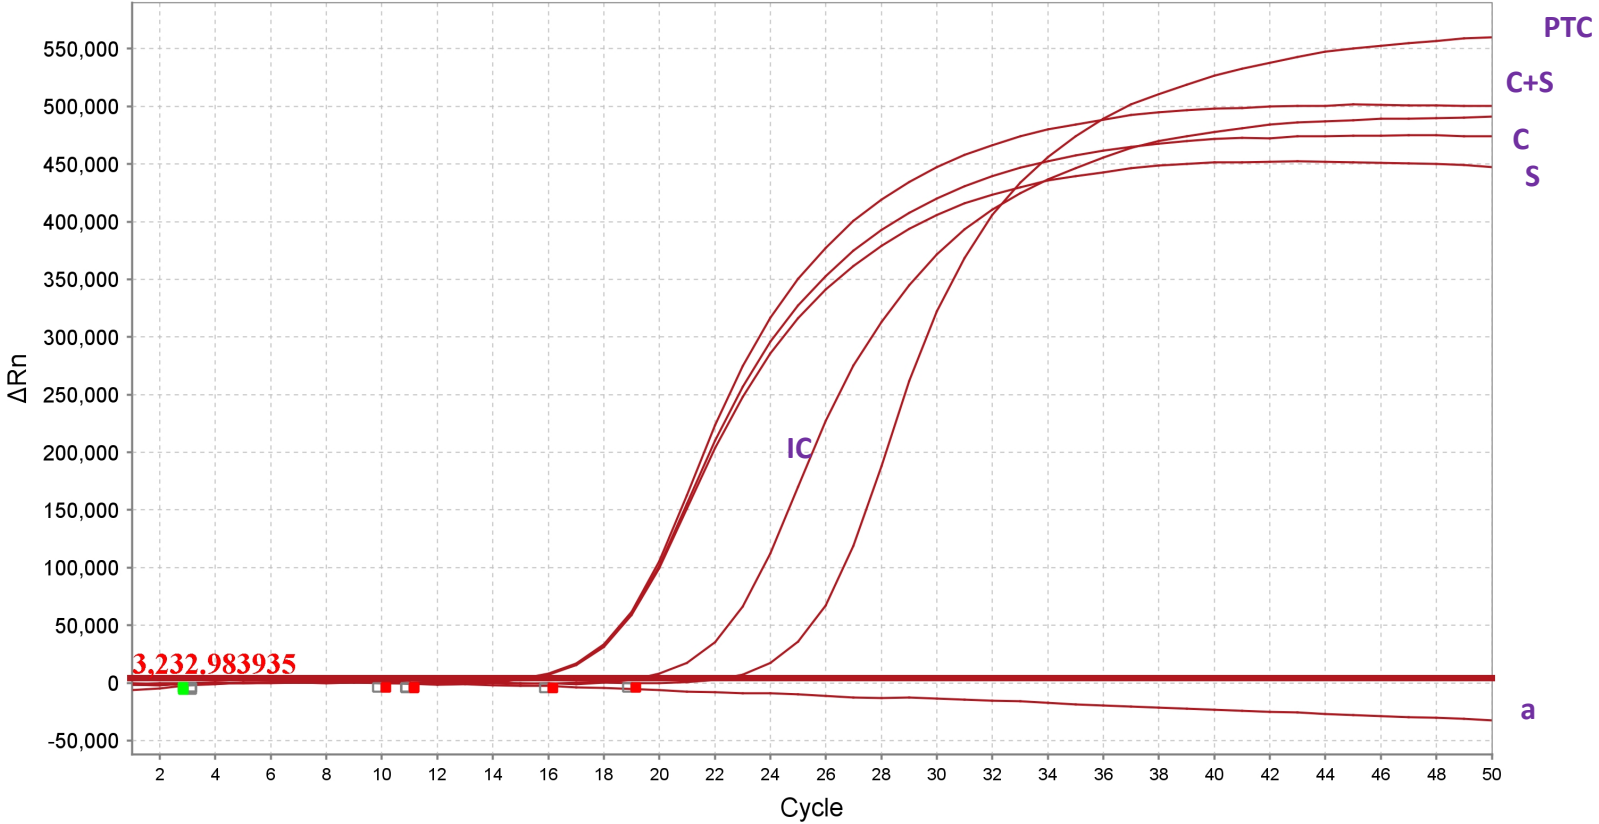

■ E- NIV

Negative test control E gene (a); Kit positive control E gene (PTC, Ct-23); Mock control E gene (IC, Ct-20);  
 Group 1:Conjunctival + Schirmer (C+S, Ct-14); Group2:Conjunctival samples (C, Ct-15); Group3: Schirmer strip (S, Ct-15)

# Amplification plot of case 40 showing confirmatory qualitative assay of RdRp gene

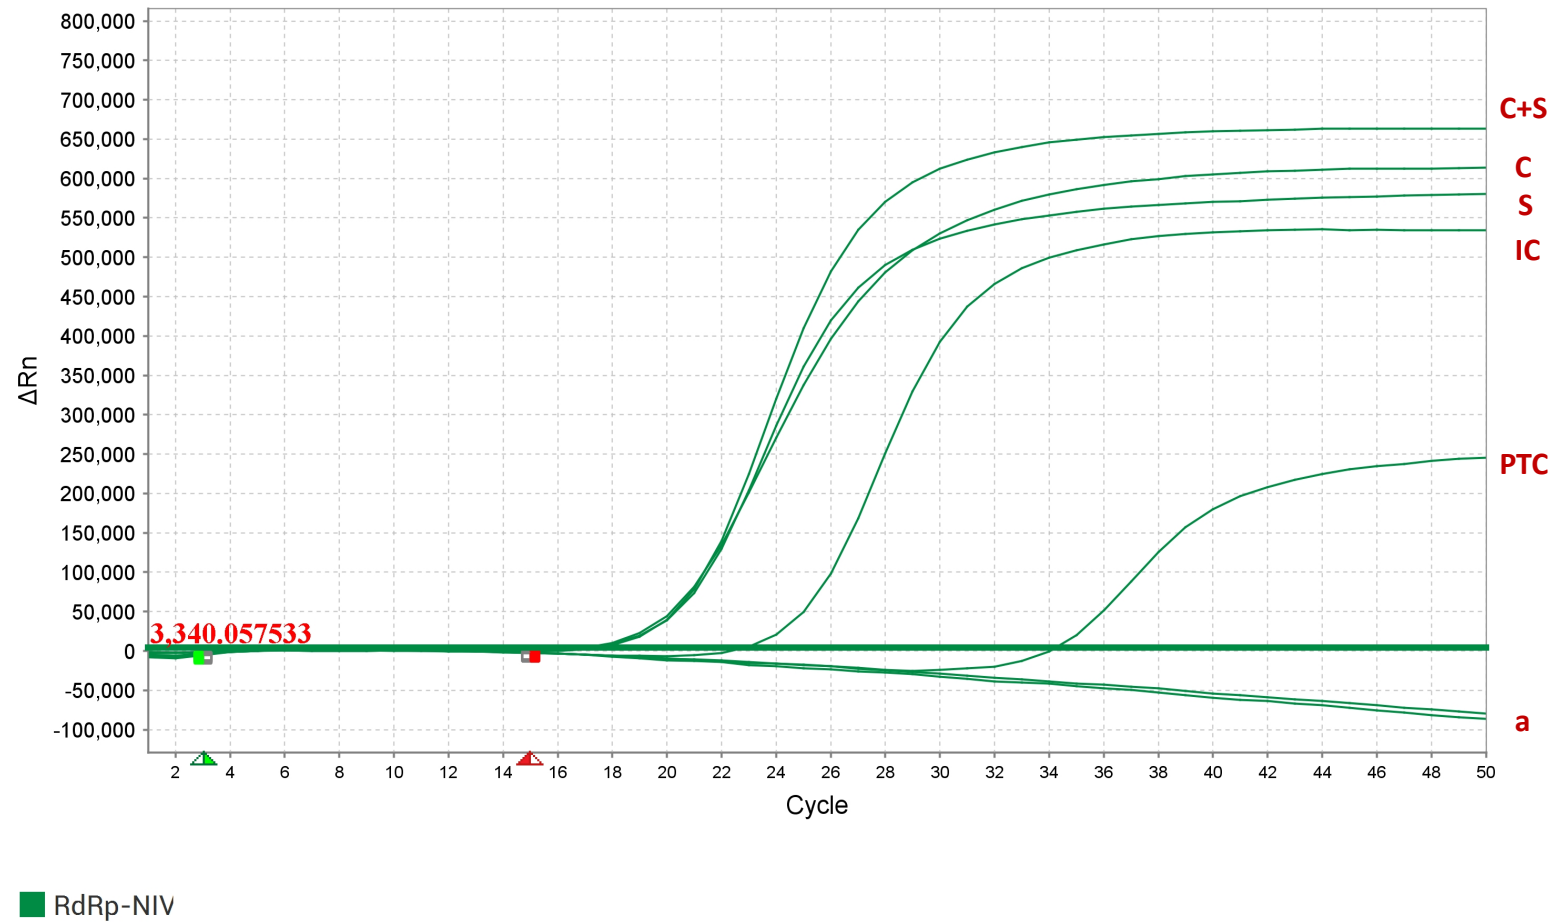

Negative test controls RdRp gene (a); Kit positive control RdRp gene (PTC, Ct-29); Mock control E gene (IC; Ct-23); Group1: Conjunctival + Schirmer (C+S, Ct-18); Group2: Conjunctival (C, Ct-18); Schirmer strip (S, Ct-18)

# Amplification plot of case 40 showing confirmatory qualitative assay of ORF1b gene

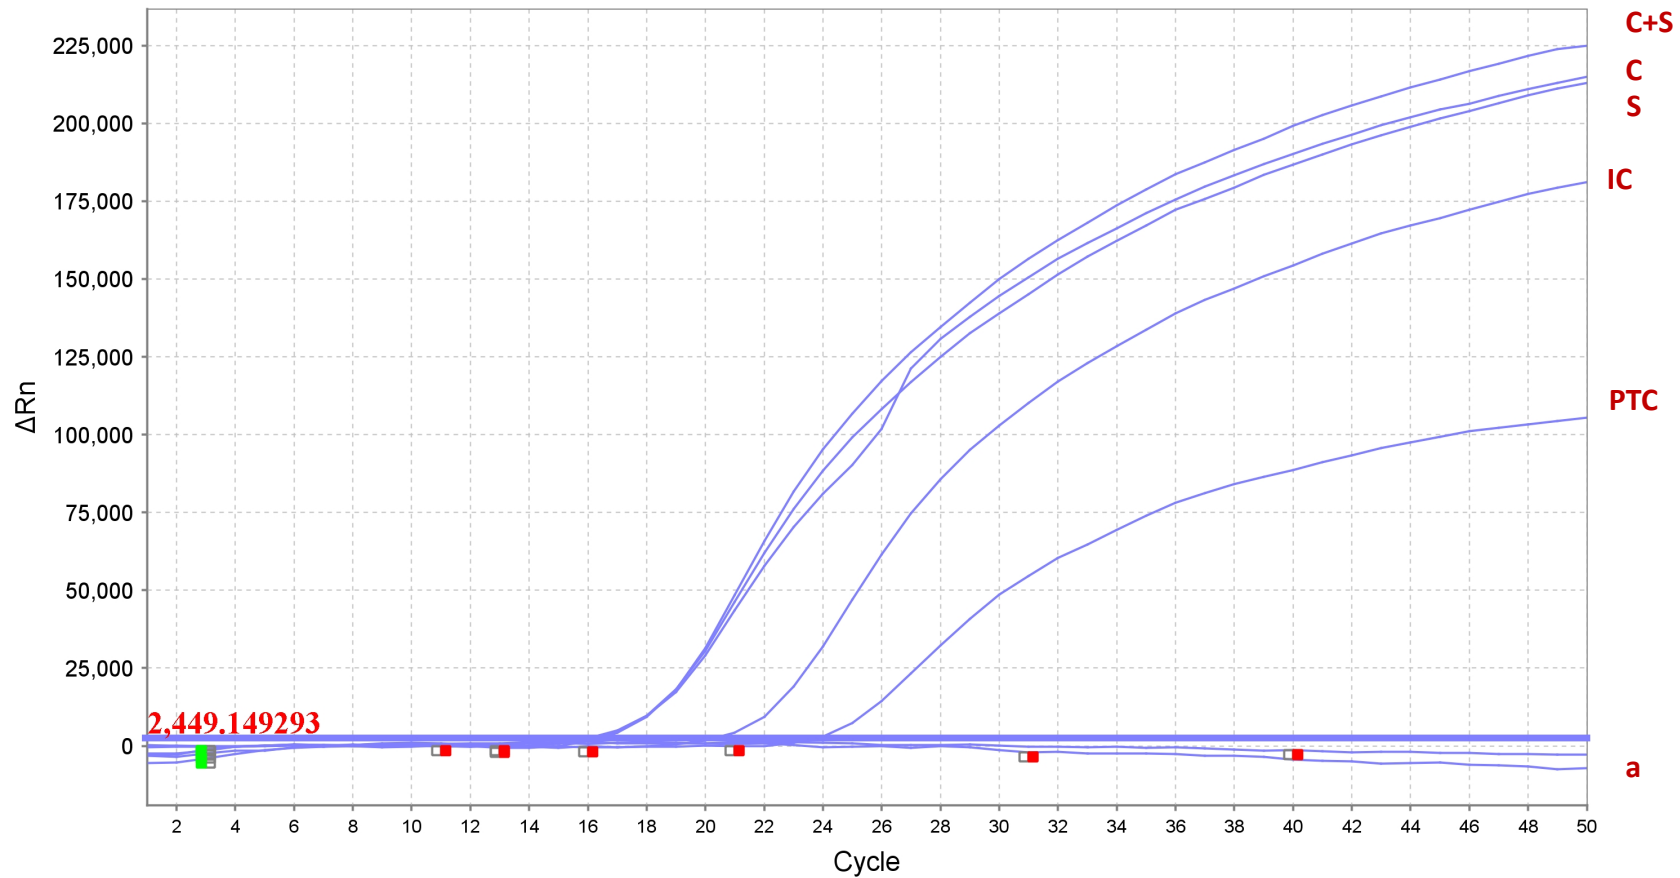

ORF-NIV

Negative test controls ORF1b gene (a); Kit positive control ORF1b gene (PTC, Ct-24); Mock control E gene (IC, Ct-21); Group1:Conjunctival + Schirmer (C+S, Ct-16); Group2: Conjunctival (C, Ct-16); Group3:Schirmer strip (S, Ct16)
